# Supplementary material for: Preparation of water-dispersible porous g-C3N4 with improved photocatalytic activity by chemical oxidation
Source: Royal Society of Chemistry journal article supplement (doi:10.1039/c4cp05020g), 2014-12-11
Supplement: c4cp05020g1.pdf [file c4cp05020g1.pdf]

## Supplementary Information

### Preparation of Water-Dispersible Porous g-C<sub>3</sub>N<sub>4</sub> with Improved Photocatalytic Activity by Chemical Oxidation

*Hui-Jun Li,<sup>a</sup> Bo-Wen Sun,<sup>a</sup> Li Sui,<sup>b</sup> Dong-Jin Qian<sup>a</sup> and Meng Chen<sup>\*a</sup>*

<sup>a</sup> Department of Chemistry, Shanghai Key Laboratory of Molecular Catalysis and Innovative Materials, Fudan University, Shanghai 200433, P. R. China

<sup>b</sup> School of Medical Instrument and Food Engineering, University of Shanghai for Science and Technology, Shanghai, 200093, P. R. China.

\* Corresponding author. E-mail: chenmeng@fudan.edu.cn

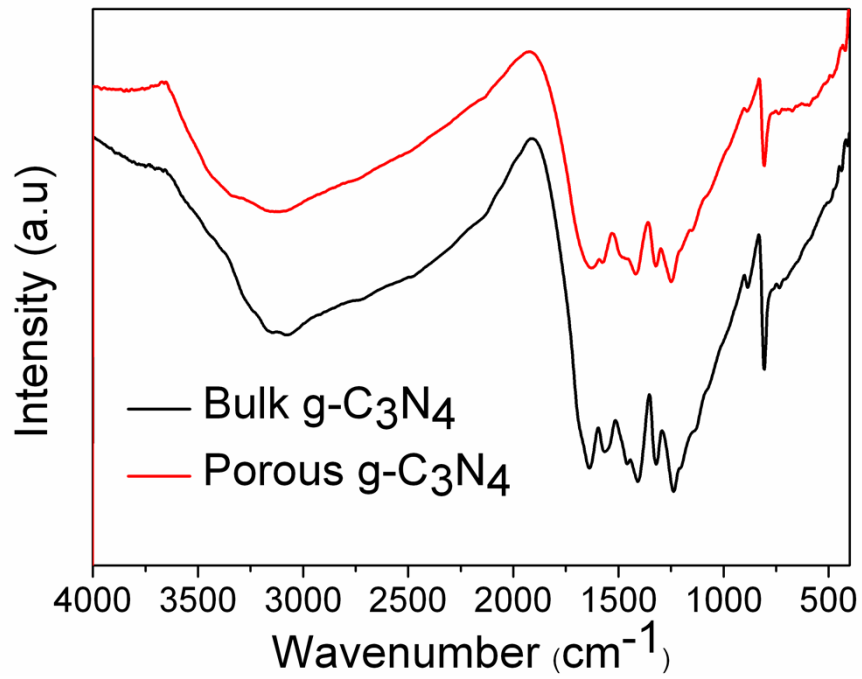

Fig. S1 FTIR spectra of the bulk g-C<sub>3</sub>N<sub>4</sub> and the porous g-C<sub>3</sub>N<sub>4</sub>.

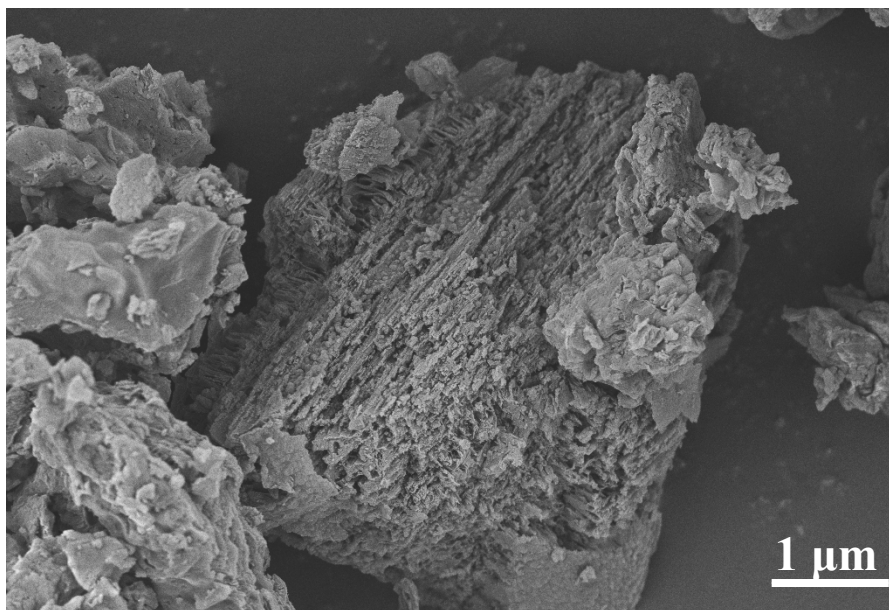

Fig. S2. SEM image of the bulk g-C<sub>3</sub>N<sub>4</sub>.

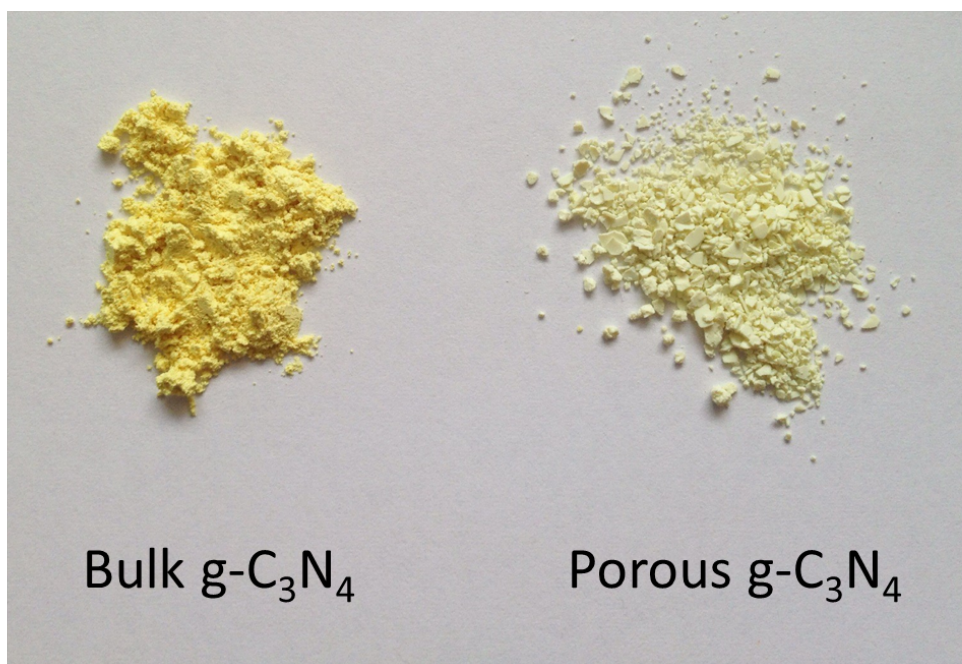

Fig. S3. Sample photos of the bulk  $g\text{-C}_3\text{N}_4$  and the porous  $g\text{-C}_3\text{N}_4$ .

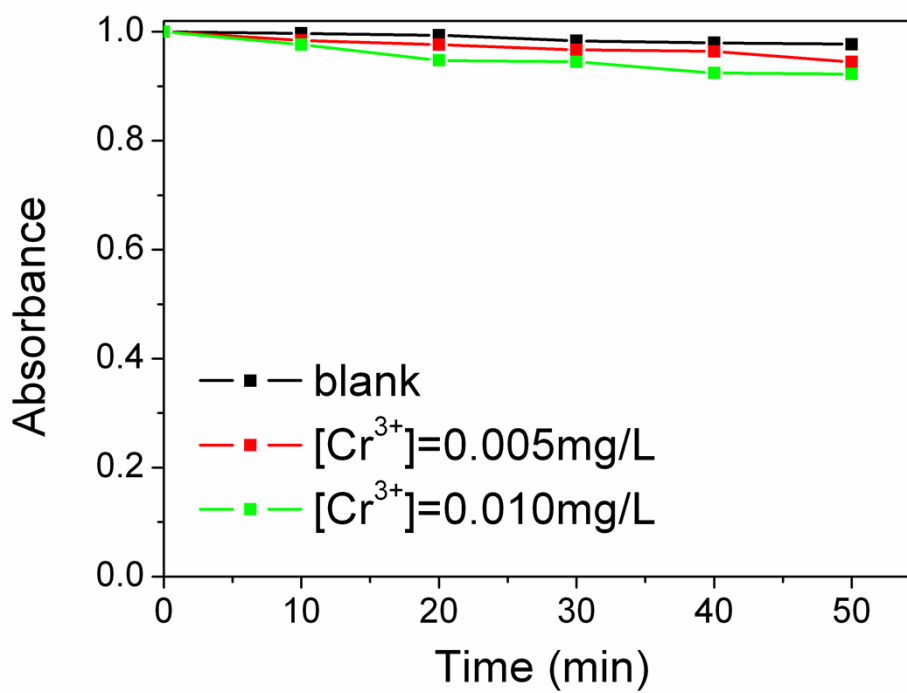

Fig. S4. The photocatalytic degradation of RhB by  $\text{Cr}^{3+}$ .
